# Supplementary material
Source: publisher figshare collection journal article supplement (https://tandf.figshare.com/ndownloader/files/20045993)

**Highly regioselective *O*-allylation of phenol derivatives using MMZCu(I)Y catalyst**

**Cheirmakani Thangapriyaa Simsonrubarathinam Ilaamirthamanib, Mayilvasagam Kumarrajab***

*aDepartment of chemistry , Sri Kaliswari College (Autonomous), Sivakasi*

*bCenter for Research and Post-graduate Studies in Chemistry,*

*Ayya NadarJanaki Ammal College (Autonomous), Sivakasi – 626 124, TamilNadu, India.*

*E-mail:* [*dr.kumarraja@gmail.com*](mailto:dr.kumarraja@gmail.com)

***Table of Contents for Supporting Information***

1. **General procedure………………………………………………………. 2**
2. **Characterization of the isolated products ……………………………... 3**
3. **References………………………………………………………………... 6**
4. **1H and 13C NMR spectra of the products……………………………… 7**
5. **General procedure for the selective synthesis of *O*-allylation of Phenolic derivatives (3a-i) using MMZCu(I)Y zeolites**

100mg of MMZCu(I)Y was taken in a reaction tube containing ethanol (3mL) as a solvent and K2CO3 (1mmol)as base. A mixture of equimolar (1mmol) phenol (**1a**) and allylbromide (**2a**) were added simultaneously to the reaction tube. The reaction mixture was allowed to stir for 10 hrs at 70°C and the proceedings of the reaction was constantly monitored by TLC. After 10 hrs, products were extracted from MMZCu(I)Y using excess amount of solvent. The organic layer was separated, dried and concentrated *in vacuo* and the residue was subjected to column Chromatography over silica gel [60-120 mesh, petether: ethylacetate, (8:2)]. The isolated products were characterized by 1H and 13C-NMR spectra on Bruker Instrument (300 MHz and 75 MHz respectively) in CDCl3.  GC-MS spectrum recorded in Agilent GC 7820A and MS 5977E Model using DB-5 Column and the new products also by HR-MS spectrums.

1. **Characterization of the isolated products**

|  | **3a (1- allyloxy benzene)**Oily Liquid1  1H NMR: (300 MHz, CDCl3): δ (7.24-7.19, t, 2H), (7.13-7.01, d, 1H), (6.87-6.83, d, 2H), (6.04-5.96, m, 1H), (5.38-5.20, dd, 2H), (4.49-4.44, d, 2H). 13C NMR (75 MHz, CDCl3): δ 158.17, 133.77, 130.71, 121.18, 118.44, 113.15, 69.99. |
| --- | --- |
|  | **3b (1-(allyloxy)-4-bromobenzene)** Colourless oily liquid2  1H NMR: (300 MHz, CDCl3): δ (7.44-7.37, d, 2H), (6.86-6.80, d, 2H), (6.10-6.01,m,1H), (5.47-5.30, dd, 2H), (4.55-4.51, d, 2H) 13C NMR (75 MHz, CDCl3): δ 157.75, 133.31, 133.01, 116.58, 118.62, 113.01, 69.33. |
|  | **3c (1-(4-(allyloxy)phenyl)ethanone)** Colourless liquid3  1H NMR: (300 MHz, CDCl3): δ (7.97-7.92, d, 2H), (7.01-6.94, d, 2H), (6.14-6.03, m, 1H), (5.47-5.33, dd, 2H), (4.65-4.63, d, 2H), (3.13, s, 3H). 13C NMR (75 MHz, CDCl3): δ 196.90, 162.36, 132.33, 130.45, 130.41, 118.63, 114.34, 69.04, 26.26. |
|  | **3d (2-(allyloxy)benzaldehyde)** Brown oil4  1H NMR: (300 MHz, CDCl3): δ (10.47, s, 1H), (7.80-7.74, d, 1H), (7.49-7.43, t, 1H), (6.98-6.93, t, 1H), (6.92-6.89,d, 1H), (6.04-5.96, m, 1H), (5.42-5.25, dd, 2H), (4.61-4.59, d, 2H), 13C NMR (75 MHz, CDCl3): 190.08, 160.99, 135.96, 132.39, 128.73, 125.49, 120.88, 118.26, 112.75, 69.32. |
|  | **3e (1-(2-(allyloxy)phenyl)ethanone)** Oily liquid4  1H NMR: (300 MHz, CDCl3): (7.78-7.74, d, 1H), (7.48-7.43, t, 1H), (7.04-6.99, t,1H), (6.96-6.94, d, 1H), (6.18-6.09, m, 1H), (5.49-5.32, dd, 2H), (4.67-4.64, d, 1H), (2.66, s, 3H) 13C NMR (75 MHz, CDCl3): 199.85, 158.08, 133.59, 132.65, 128.71, 128.41, 120.58, 118.20, 112.78, 69.32, 32.43. |
|  | **3f (1-(allyloxy)-2-chlorobenzene)** Pale Yellow liquid2  1H NMR: (300 MHz, CDCl3): δ (7.41-7.38, d, 1H), (7.24-7.18, t, 1H), (6.96-6.92, t, 2H), (6.15-6.05, m, 1H), (5.53-5.52, dd, 2H), (4.68-4.67, d, 2H) 13C NMR (75 MHz, CDCl3): 154.16, 132.63, 130.66, 128.14, 123.14, 121.85, 117.96, 114.04, 69.68 |
|  | **3g (1-(allyloxy)-4-chlorobenzene)** Brownish colour2  1H NMR: (300 MHz, CDCl3): δ (7.29-7.24, d, 2H), (6.90-6.83, d, 2H), (6.10-6.01, m, 1H),( 5.46-5.30, dd, 2H), (4.55-4.53, d, 2H). 13C NMR (75 MHz, CDCl3): δ 157.44, 133.77, 129.89, 126.10, 118.02, 116.59, 69.55 |
|  | **3h (2-(allyloxy)naphthalene)** Yellow oily liquid2  1H NMR: (300 MHz, CDCl3): δ (7.93-7.87,d, 1H), (7.85-7.80, t,2H), (7.56-7.52, t, 1H), (7.47-7.42, t, 1H), (7.31, s, 1H), (7.24-7.23, d, 1H), (6.27-6.12, m, 1H), (5.61-5.33, dd, 2H), (4.78-4.71, d, 2H) 13C NMR (75 MHz, CDCl3): 156.79, 133.30, 129.53, 129.14, 128.54, 127.77, 126.97, 126.54, 123.77, 118.94, 117.84, 107.10, 70.60. |
|  | **3i (8-(allyloxy)quinoline)** Yellow colour2  1H NMR: (300 MHz, CDCl3): δ (8.88-8.87, d, 1H), (8.06-8.04, d, 1H), (7.37-7.36, t, 1H), (7.35-7.33, t, 1H ), (7.32-7.30, d, 1H), (7.01-6.97, d, 1H), (6.18-6.10, m, 1H), (5.43-5.25, dd, 2H), (4.81-4.79, d, 2H) 13C NMR (75 MHz, CDCl3): 154.41, 149.34, 140.48, 136.03, 133.12, 129.05, 126.53, 121.71, 119.73, 118.44,109.31, 69.60 |
|  |  |
|  | **3j(ethyl-2-(4allyloxy)-3-formylphenyl)-4-methylthiazole-5-carboxylate)3**  1H NMR: (300 MHz, CDCl3):δ(10.53, s, 1H), (8.36, s, 1H), (8.28-8.10, d, 1H), (7.10-7.01, d, 1H), (6.06-6.01, m, 1H), (5.50-5.28, dd, 2H), (4.80-4.68, d, 2H), (4.40-4.38, q, 2H), (2.76, s, 3H), (1.43-1.36, t, 3H). 13C NMR (75 MHz, CDCl3): 189.23, 168.99, 162.76, 161.61, 160.61, 134.48, 132.18, 132.00, 128.06, 127.51, 125.31, 119.24, 116.60, 69.99, 61.54, 17.67, 14.58. HRMS (ESI) m/z Cald for (C17H17NO4S): 331.3829, [M+H]+: found: 332.0965. |
|  | **3k (7-(allyloxy)-2H-chrome n-2-one)3**  1H NMR: (300 MHz, CDCl3): (7.65-7.63, d, 1H), (7.38-7.35, d, 1H), (7.01, s, 1H), (6.88-6.82, d, 1H), (6.26-6.23, d, 1H), (6.10-6.03, m, 1H), (5.47-5.32, dd, 2H), (4.61-4.53, d, 2H). 13C NMR (75 MHz, CDCl3): 161.58, 160.38, 156.22, 143.79, 132.52, 129.25, 118.94, 113.55, 113.05, 112.18, 104.79, 69.65. HRMS (ESI) m/z Cald for (C12H10O3): 202.2038, [M+H]+: found: 203.0704. |
|  |  |
|  |  |

1. **Reference:**
2. [L. Kong](http://pubs.rsc.org/en/results?searchtext=Author%3ALingjie%20Kong),   [Q. Lin](http://pubs.rsc.org/en/results?searchtext=Author%3AQi%20Lin),   [X. Lv](http://pubs.rsc.org/en/results?searchtext=Author%3AXiaoming%20Lv),   [Y. Yang](http://pubs.rsc.org/en/results?searchtext=Author%3AYongtai%20Yang),  [Y.Jia](http://pubs.rsc.org/en/results?searchtext=Author%3AYu%20Jia),  [Y. Zhou](http://pubs.rsc.org/en/results?searchtext=Author%3AYaming%20Zhou), *Green Chem.*, 2009,**11**, 1108-1111.
3. S.H. Jayaprakash, B.S. Krishna, S. Siva Prasad, S. Santhi Sudha, C.S. Reddy, *Syn.Comm., 2015,* ***45***, 355-36.
4. [Imran Kazi](https://pubs.acs.org/action/doSearch?field1=Contrib&text1=Imran++Kazi), [Somraj Guha](https://pubs.acs.org/action/doSearch?field1=Contrib&text1=Somraj++Guha), [Govindasamy Sekar](https://pubs.acs.org/action/doSearch?field1=Contrib&text1=Govindasamy++Sekar), *Org. Lett.,* 2017, **19**, 5, 1244-1247.
5. Christian E. Madu, H.V. Rasika Dias, Carl J. Lovely, *Tetrahedron,* 2017, **73**, 6118-6137.

**1HNMR and 13CNMR data of the isolated compounds**


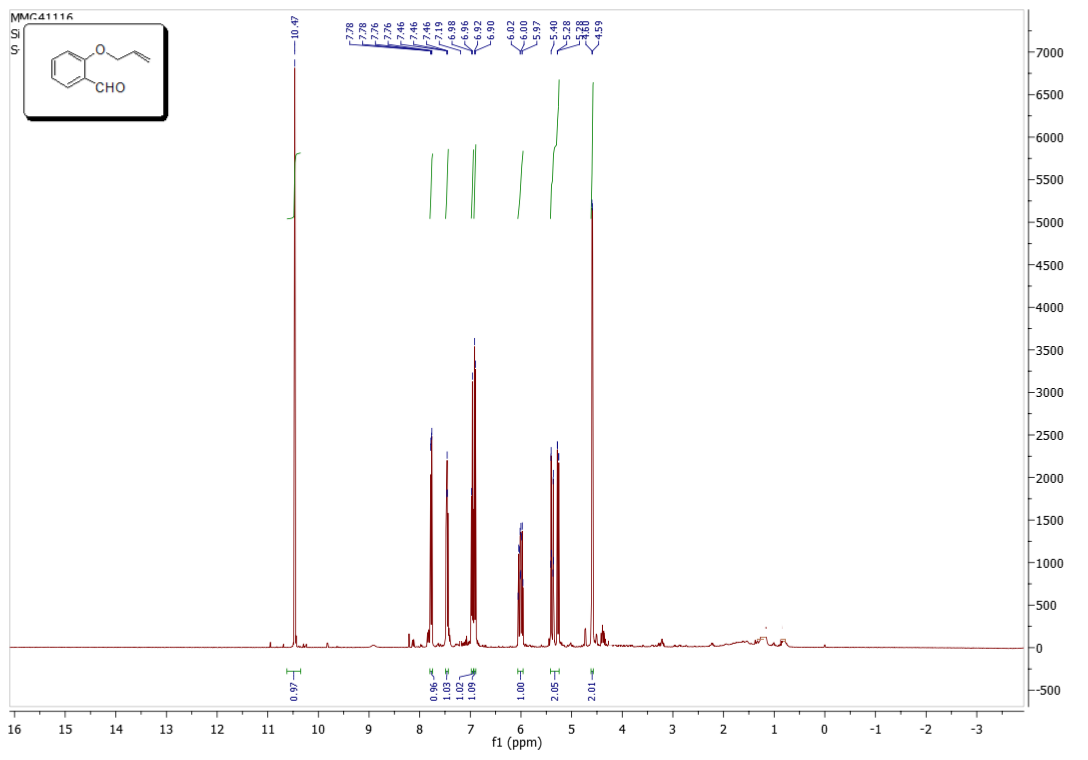

Supplement: Supplementary file 1 [file 20045993]
